# Supplementary material
Source: publisher site journal article supplement (https://www.dovepress.com/article/233993)
Supplement: Supplementary file 1 [file get_supplementary_file.php]

**Comparison of real-world treatment patterns among psoriasis patients treated with ixekizumab or adalimumab**

**eFigure 1. Kaplan Meier curve (weighted) for probability of persistence (45-day gap) (IXE versus ADA, sensitivity analyses)**


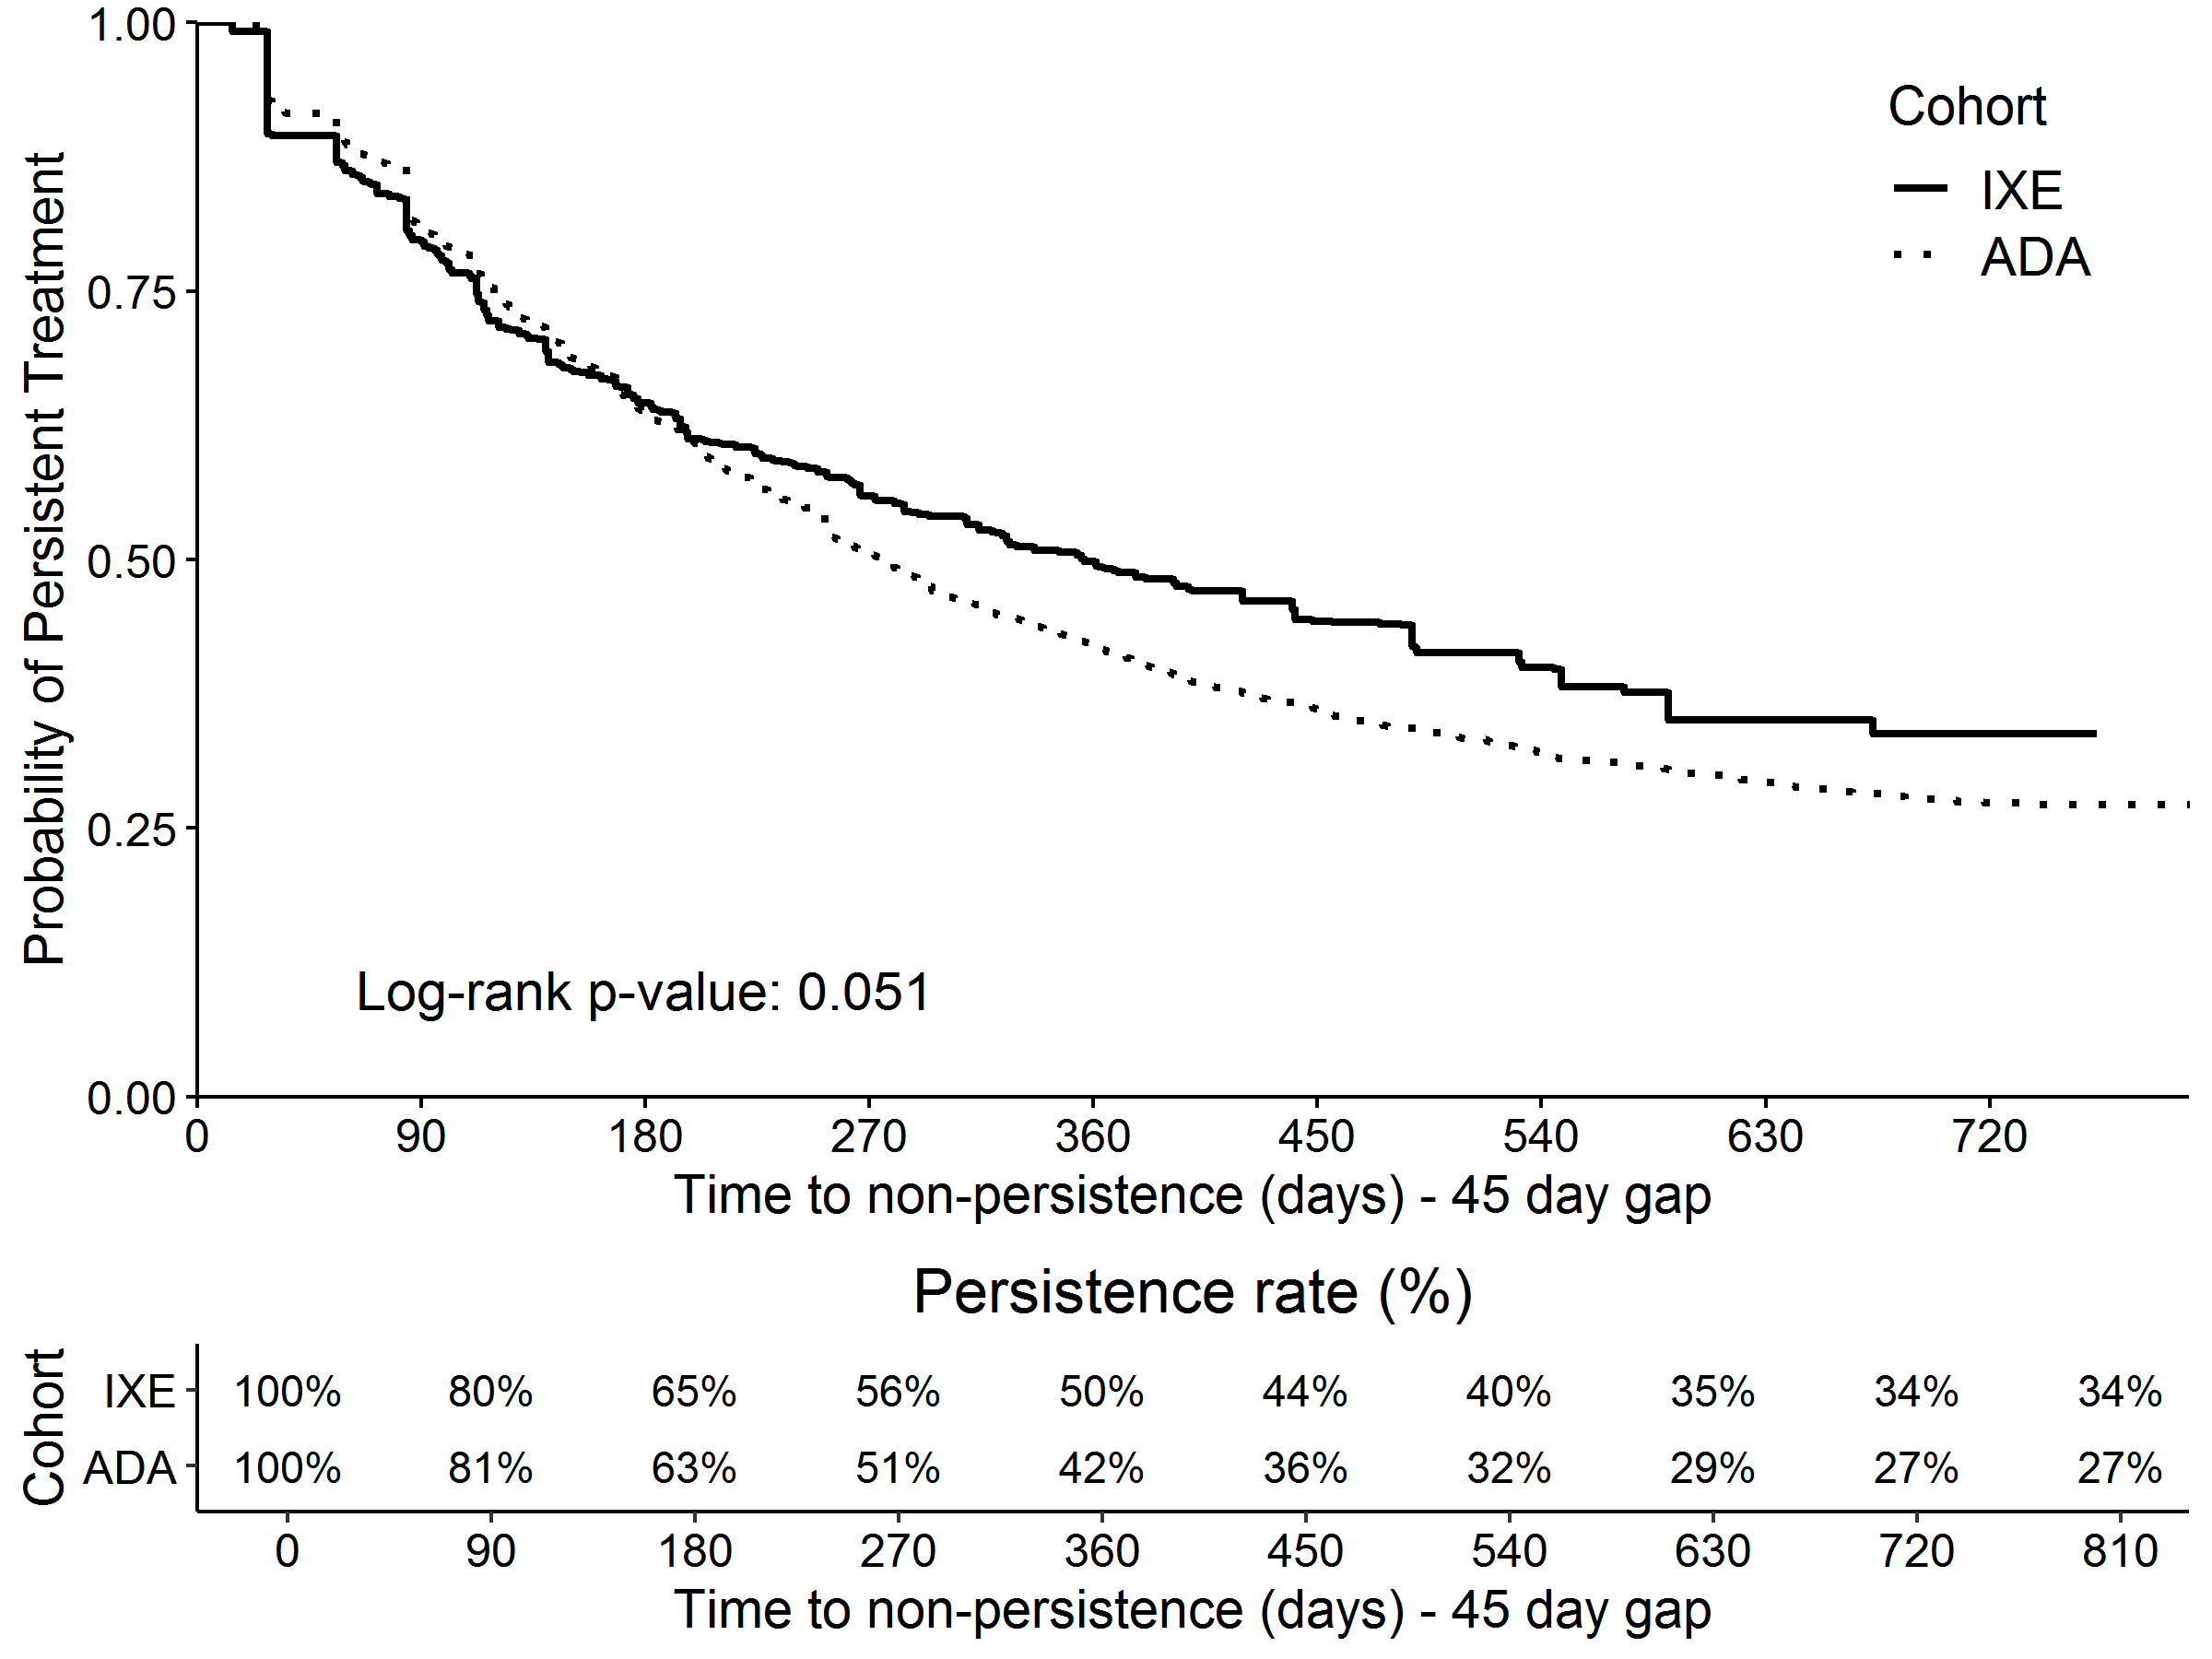


ADA, adalimumab; IXE, ixekizumab

**eFigure 2. Kaplan Meier curve (weighted) for probability of persistence (90-day gap) (IXE versus ADA, sensitivity analyses)**


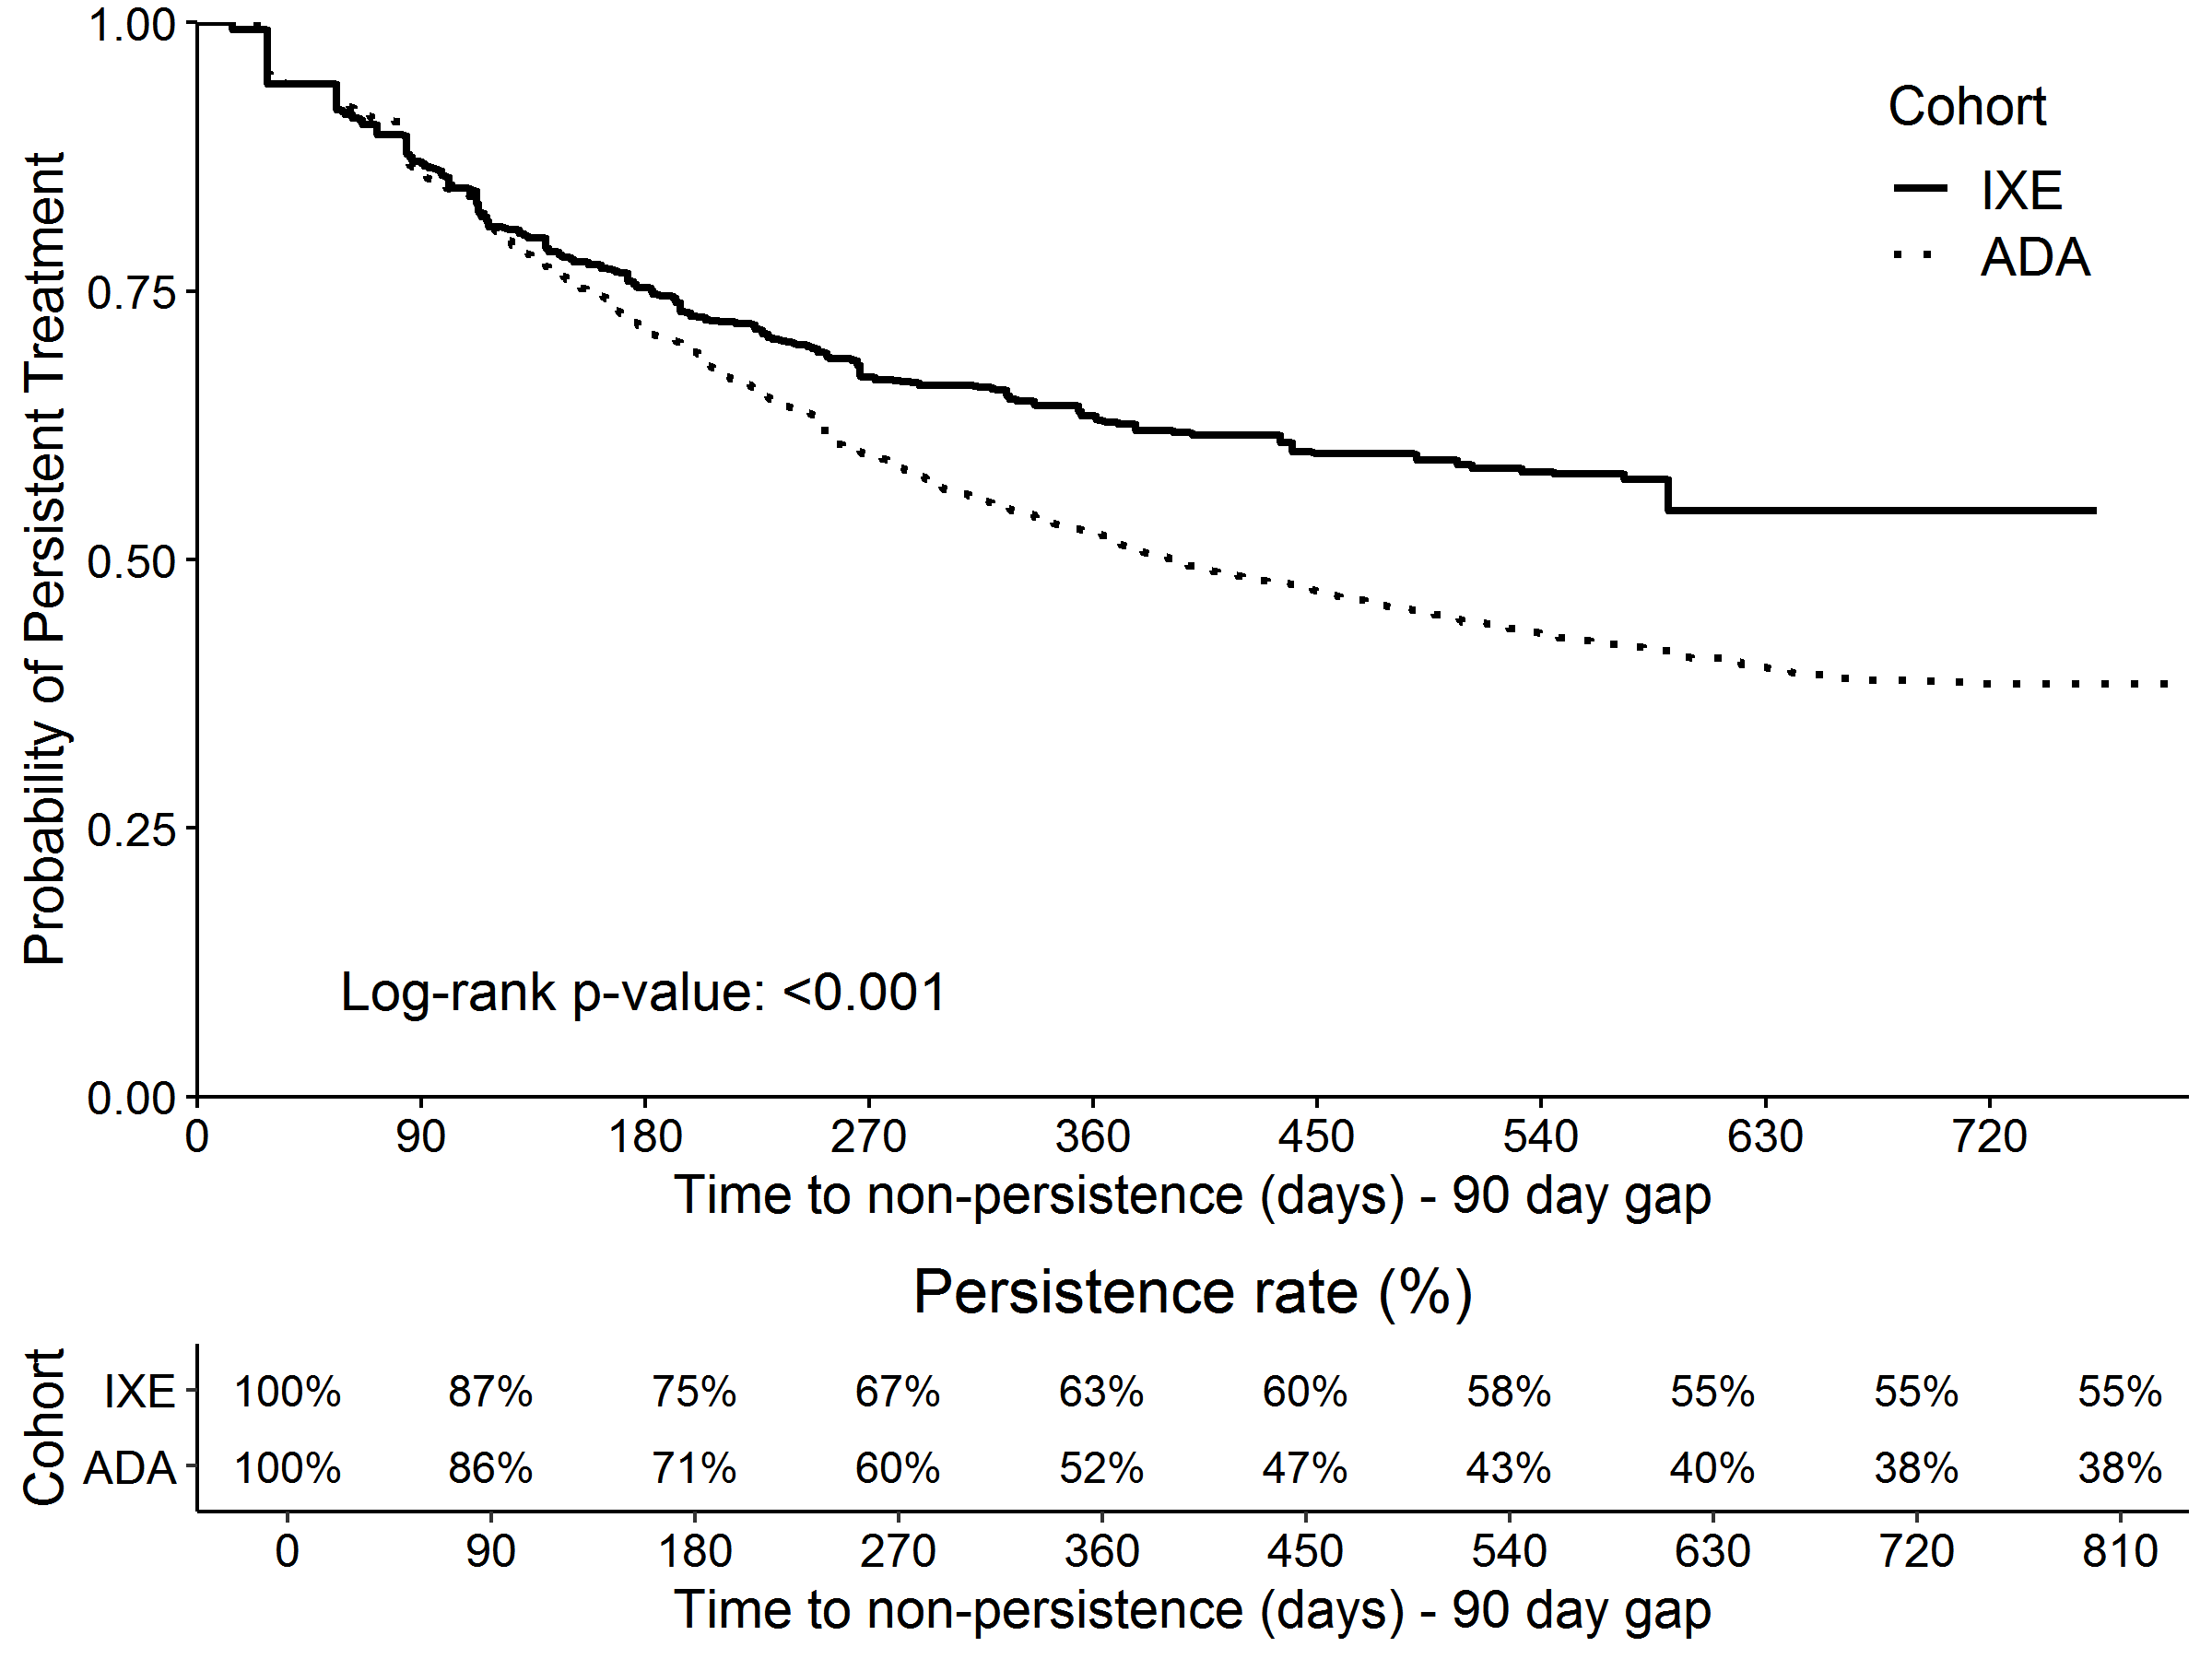


ADA, adalimumab; IXE, ixekizumab
